# Supplementary material for: One-pot conversion of lysine to caprolactam over Ir/H-Beta catalysts
Source: Royal Society of Chemistry journal article supplement (doi:10.1039/c9gc00415g), 2019-01-01
Supplement: c9gc00415g1.pdf [file c9gc00415g1.pdf]

## Supporting Information

### **One-pot Conversion of Lysine to Caprolactam over Ir/H-Beta Catalysts**

---

Joby Sebastian, Mingyuan Zheng\*, Yu Jiang, Yu Zhao, Hua Wang, Zhendong Song, Xinsheng Li, Jifeng Pang and Tao Zhang\*

Dalian Institute of Chemical Physics, Chinese Academy of Sciences, Dalian 116023, P.R. China. E-mail: [myzheng@dicp.ac.cn](mailto:myzheng@dicp.ac.cn); [taozhang@dicp.ac.cn](mailto:taozhang@dicp.ac.cn).

## Experimental section

**Materials:** The zeolites (HB-124, HB-80, HB-50, HY-10, ZSM-5 (42)) were purchased from Nankai University Catalyst Co. Ltd., acidic  $\text{Al}_2\text{O}_3$ , anatase  $\text{TiO}_2$ ,  $\text{CeO}_2$ ,  $\text{MoS}_2$ ,  $\text{Nb}_2\text{O}_5$ ,  $\text{La}_2\text{O}_3$  and Activated carbon were all commercial. The precursors for noble and non-metals are 21.06 wt%  $\text{H}_2\text{IrCl}_6$  solution in  $\text{H}_2\text{O}$ ,  $\text{RhCl}_3 \cdot x\text{H}_2\text{O}$ ,  $\text{HAuCl}_4 \cdot x\text{H}_2\text{O}$ ,  $\text{RuCl}_3$ ,  $\text{H}_2\text{PtCl}_6 \cdot 6\text{H}_2\text{O}$ ,  $\text{PdCl}_2$ ,  $\text{HReO}_4$  and  $\text{Ni}(\text{NO}_3)_2 \cdot 6\text{H}_2\text{O}$ .

**Reagents:** *L*-lysine,  $\alpha$ -amino- $\epsilon$ -caprolactam (*L* and *DL*- ACPL) hydrochloride, anhydrous  $\text{MeOH}$  ( $\text{H}_2\text{O} < 0.05\%$ ), THF, ethanol, 1,2-propanediol,  $\gamma$ -valerolactone, 37%  $\text{HCHO}$  solution. All the reagents were used as received.

**Catalyst synthesis:** All the catalysts were prepared by the incipient wetness impregnation method. A typical synthesis of 2Ir/HB-124 as follows, first the support was dried at  $550^\circ\text{C}$  for 6 hours. To 1.0 g of the dried support, 0.095 mL of  $\text{H}_2\text{IrCl}_6$  precursor solution (21.06 wt% of Ir) along with 1.5 mL of deionized  $\text{H}_2\text{O}$  was added. It was then mixed well, covered and kept at room temperature for 6 hours followed by drying at  $80^\circ\text{C}$  for 12 hours. It was then ground and calcined at  $550^\circ\text{C}$  ( $2^\circ\text{C}/\text{min}$ ) for 4 hours. The catalyst was used for the experiments without any pretreatments. The same procedure was followed for other supports like  $\text{Al}_2\text{O}_3$ ,  $\text{TiO}_2$ ,  $\text{CeO}_2$  and AC. The calcination step was avoided for AC.

Catalysts with other metals such as Rh, Pt, Ru, Au, Pd, Re and Ni were also prepared following the above procedure. These catalysts were reduced at a temperature of  $300^\circ\text{C}$  for Rh, Ru, Pd, Au,  $350^\circ\text{C}$  for Pt,  $400^\circ\text{C}$  for Ir/AC,  $450^\circ\text{C}$  for Ni and  $500^\circ\text{C}$  for Re for 3 hours ( $3^\circ\text{C}/\text{min}$ ) and then passivated in the  $\text{O}_2/\text{N}_2$  mixture for 4 hours.

**One-pot conversion of *L*-lysine to CPL:** The reaction was performed in a high-pressure Parr-4848 Hastelloy autoclave (100 mL) equipped with a mechanical stirrer and an automatic temperature control system. The reactor was first charged with 0.200 g of *L*-lysine and 0.100 g of 2Ir/HB-124 catalyst. A volume of 20 mL of anhydrous methanol was then introduced. Then the reactor was purged with  $\text{H}_2$  (10 bar) for at least five times and pressurized to 20 bar. The reactor temperature was slowly increased to  $240^\circ\text{C}$  ( $2.2^\circ\text{C}/\text{min}$ ) and maintained for a period of 6 hours. At the end of the reaction time, the reactor was cooled down to room temperature. It was then depressurized, the product mixture was filtered and analyzed by HPLC and GC. Recycle experiments were

conducted as follows; after the reaction, the catalyst was separated by filtration and used for the next run without any pretreatments like drying or calcination.

**ACPL to CPL:** About 0.050 g of *L*-ACPL.HCl was charged into the reactor along with 0.025 g of 2Ir/HB-124 and 20 mL of anhydrous methanol. The reactor was purged with H<sub>2</sub> (10 bar) at least five times and pressurized to 20 bar. The temperature was slowly increased to 250°C (2°C/min) and maintained for a period of 1 hour. At the end of the reaction time, the reactor was cooled down, depressurized, filtered and analyzed by HPLC and GC.

**DMAC to CPL:** About 0.050 g of DMAC was introduced to the reactor along with 0.025 g of 2Ir/HB-124 and 20 mL of anhydrous methanol. It was then purged with H<sub>2</sub> and pressurized to 20 bar. The temperature was set to 250°C (2°C/min) and the reaction time to 1 hour. At the end of the reaction time, the reactor was cooled down, depressurized, the product was filtered and analyzed by GC. Recycle experiments were conducted as follows; after the reaction, the catalyst was separated by filtration and used for the next run without any pretreatments like drying or calcination.

**Fixed-bed reactions of DMAC to CPL:** The reactions were carried out in a stainless steel tube reactor (6 mm i.d. and 31 cm length). 2Ir/HB-124 was sieved into a 20-40 mesh size and loaded (0.30 g) into the reactor. The reactor was heated to 250°C (2°C/min) under a H<sub>2</sub> flow of 50 mL/min. The hydrogen pressure in the reactor was maintained at 65 bar throughout the reaction and the flow was maintained at 50 mL/min. A 0.25 wt% of DMAC in anhydrous methanol was used as the feed (0.5 mL/min, WHSV = 100). Product samples were collected at regular time intervals and were analyzed by GC.

**Synthesis of DMAC:** About 1.0 g of *L*-ACPL.HCl, 0.720 g of 5Pd/AC, 1.7 mL of 37% HCHO and 20 mL of anhydrous methanol were charged into the reactor. The reactor was then flushed five times with 10 bar H<sub>2</sub> and pressurized to 40 bar. The reactor temperature was set to 50°C and time to 4 hours. In the end, the reactor was cooled down to room temperature and depressurized. The solvent methanol and unreacted HCHO were removed by rota-evaporation and the solid product obtained was double recrystallized from methanol-ethyl acetate mixtures. The final product, DMAC was obtained through decantation and drying at 60°C overnight. The purity of the product was analyzed by <sup>1</sup>H

&  $^{13}\text{C}$  NMR spectroscopy (Figure S4). It was found that the purity of DMAC as-prepared is >98%.

**Product analysis:** *L*-lysine and *L*-ACPL conversions were analyzed by using an HPLC instrument (Column: ACE Excel 5 AQ, 250 x 4.6 mm id, UV-detector 210 nm, 35°C, solvent A = H<sub>2</sub>O containing 10 mmol of HCOONH<sub>4</sub>, solvent B = 90% CH<sub>3</sub>CN and 10% H<sub>2</sub>O, flow = 0.6 mL of 80% A & 20% B). DMAC conversion and CPL yield were quantified using a GC instrument fitted with an FFAP column (30m x 0.32 mm). Identification of the products was done using a GC-MS instrument fitted with a DB-5 column (30 m x 0.25 mm x 0.25 μm). The conversion, yield and selectivity of different compounds were calculated using the following equations with the calibrated values (benzyl alcohol as the standard).

$$\text{Conversion (\%)} = \frac{\text{Input lysine (mol)} - \text{Output lysine (mol)}}{\text{Input lysine (mol)}} \times 100$$

$$\text{Product yield (\%)} = \frac{\text{Moles of CPL (or DMAC)}}{\text{Input lysine (mol)}} \times 100$$

$$\text{CPL selectivity (\%)} = \frac{\text{Moles of CPL}}{\text{Moles of DMAC converted}} \times 100$$

**Nitrogen balance of the reaction:** The amount of nitrogen in the reaction can be partially balanced to DMAC formation. On the other hand, dimethylamine and trimethylamine<sup>15</sup> might be formed *via* C-N(CH<sub>3</sub>)<sub>2</sub> bond hydrogenolysis of DMAC in methanol, and will contribute to the nitrogen balance. Figure S5 shows the GC-MS spectra of the product mixture. Notable amount of trimethylamine was found in the products but without dimethylamine observation. Because of the high volatility and the difficulty in the accurate quantification, the byproduct trimethylamine was not quantified. Thus, it can be confirmed that besides DMAC, trimethylamine is the major co-product which contributes to the nitrogen balance.

The molecular dimensions of *L*-lysine, ACPL, DMAC and CPL were calculated using Materials Studio software.

**ICP-OES analysis:** The amount of Ir leached in to the product mixture was analyzed on a PerkinElmer ICP-OES 7300DV instrument after removing the organic phase.

**Table S1:** Effect of solvent on CPL production from *L*-lysine and DMAC.

| Solvent                                  | CPL yield (mol%) |
|------------------------------------------|------------------|
| Methanol                                 | 23.0             |
| Ethanol                                  | 2.8              |
| Tetrahydrofuran                          | --               |
| 1,2-Propanediol                          | --               |
| $\gamma$ -valerolactone                  | --               |
| H <sub>2</sub> O                         | --               |
| Methanol + H <sub>2</sub> O <sup>a</sup> | 13.8             |
| Ethanol <sup>b</sup>                     | < 1              |
| Tetrahydrofuran <sup>b</sup>             | < 1              |

Reaction conditions: *L*-lysine = 0.200g, 2Ir/HB-124 = 0.100g, solvent = 20 mL, P<sub>H2</sub> = 30 bar, T = 240°C, t = 6 h. <sup>a</sup>MeOH = 19.5 mL and H<sub>2</sub>O = 0.5 mL, t = 4 h. <sup>b</sup>DMAC as the feedstock.

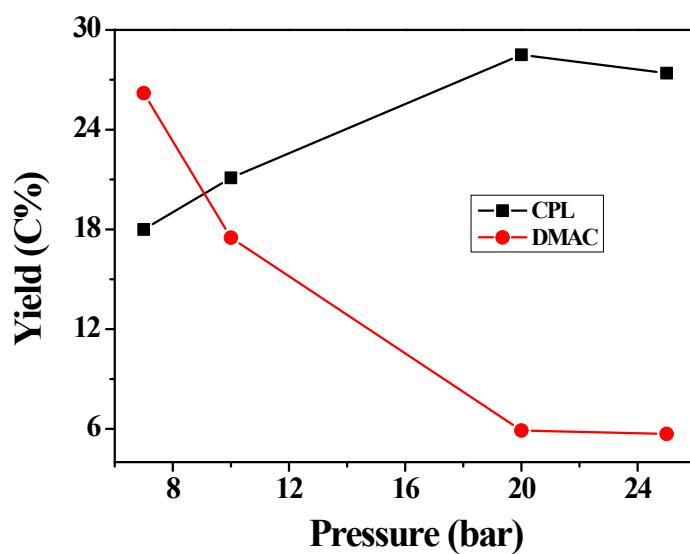

**Figure S1:** Effect of reaction pressure on DMAC and CPL yield. *Reaction conditions:* *L*-lysine = 0.200g, 2Ir/HB-124 = 0.100g, MeOH = 20 mL, T = 250°C, t = 4 h.

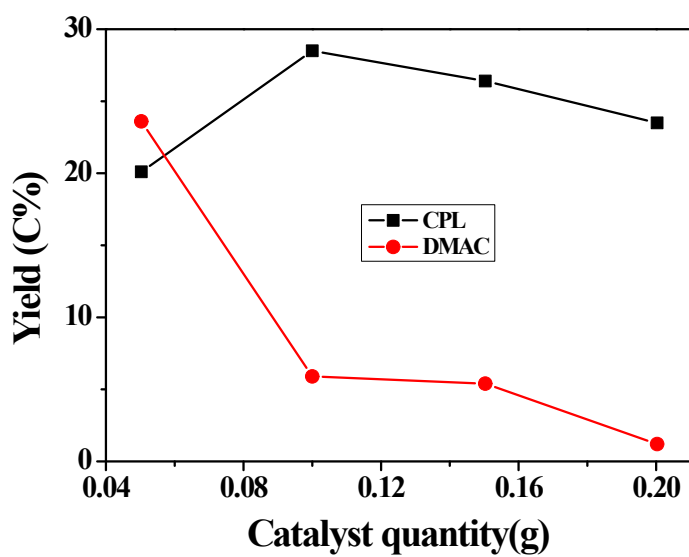

**Figure S2:** Effect of catalyst quantity on DMAC and CPL yield. *Reaction conditions:* *L*-lysine = 0.200g, MeOH = 20 mL, T = 250°C, P<sub>H<sub>2</sub></sub> = 20 bar, t = 4 h.

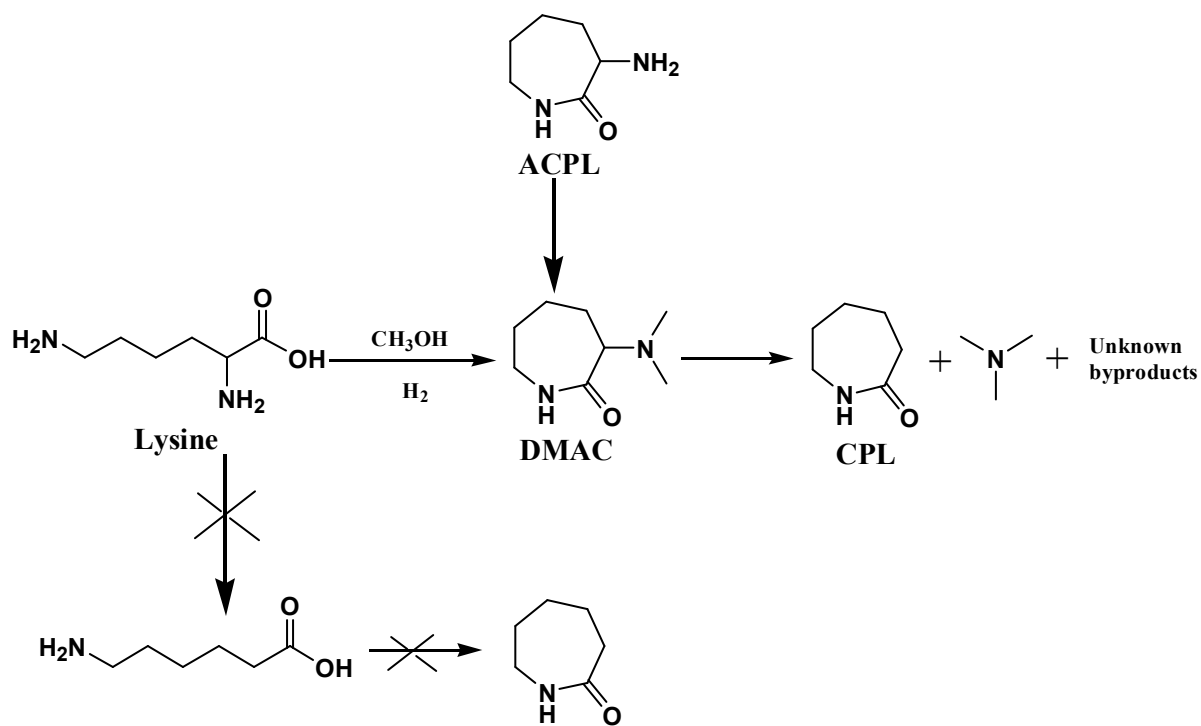

**Figure S3:** Summary of the *L*-lysine to CPL reaction route observed over Ir/HB-124 catalysts.



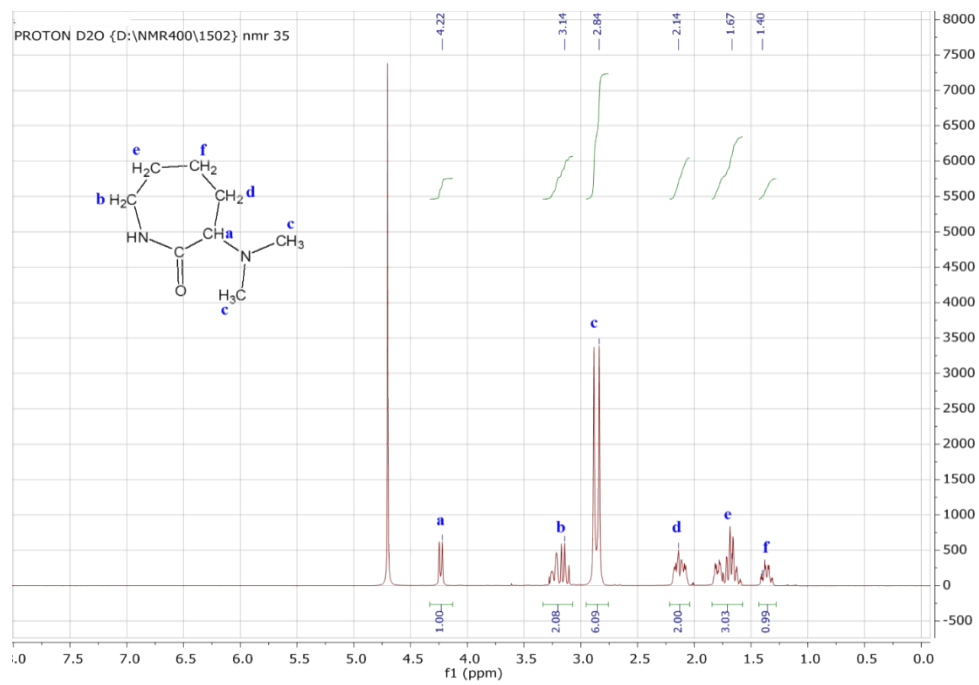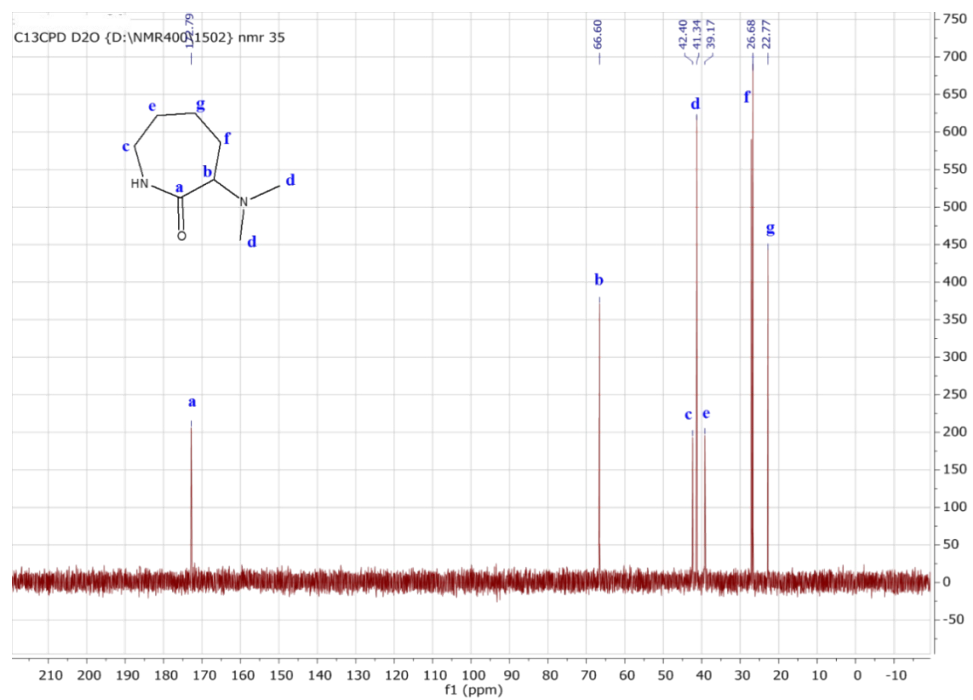

**Figure S4:**  $^1\text{H}$  and  $^{13}\text{C}$ -NMR spectra of purified DMAC in  $\text{D}_2\text{O}$  synthesized from *L*-ACPL.HCl.

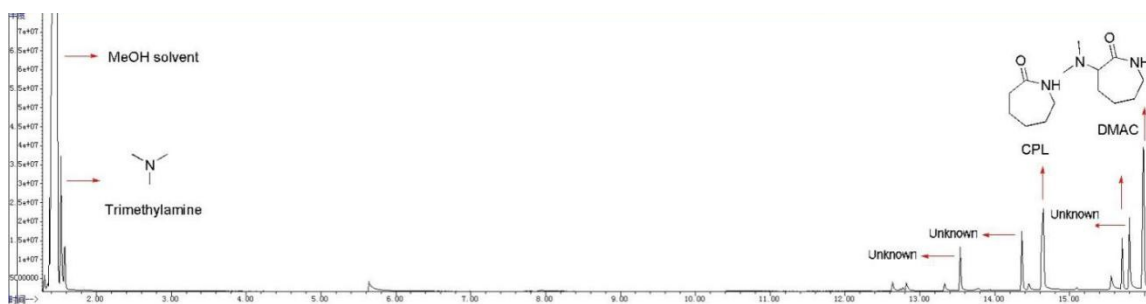

**Figure S5:** GC-MS spectra of product mixture showing the presence of trimethylamine. *Reaction conditions:* *L*-lysine = 0.200g, 2Ir/HB-124 = 0.100 g, MeOH = 20 mL,  $P_{H_2}$  = 30 bar,  $T$  = 240 °C,  $t$  = 6 h.
